# Supplementary material for: In-Depth Longitudinal Comparison of Clinical Specimens to Detect SARS-CoV-2
Source: MDPI journal article supplement (doi:10.3390/pathogens10111362), 2021-10-21
Supplement: s1 [file s1]

## Supplementary material

Table S1. Effect of time on viral load (CT values) in each sample specimen.

| Sampling | Intercept | Slope (time effect) |
|----------|-----------|---------------------|
| NP       | 28.0      | 0.34                |
| Pool     | 29.1      | 0.28                |
| TW       | 30.6      | 0.23                |
| S        | 31.9      | 0.23                |
| OP       | 32.8      | 0.20                |

Table S1 Linear mixed-effect model of CT value with respect to time, sampling methods and their interaction. The sampling methods are sorted by decreasing slope.

Table S2. Comparison of the agreement between NP and TW (Cohen's kappa coefficient) at T1

|    |          | TW        |           |            |
|----|----------|-----------|-----------|------------|
| NP |          | Negative  | Positive  | Total      |
|    | Negative | 4 (5.9)   | 7 (10.3)  | 11 (16.2)  |
|    | Positive | 15 (22.1) | 42 (61.8) | 57 (83.8)  |
|    | Total    | 19 (27.9) | 49 (72.1) | 68 (100.0) |

Table S3. Effect of rhinorrhea on the probability of detecting SARS-CoV-2 at T1

| Swab | Categories | Total<br>N | Covariate: Rhinorrhea |            |              |           | Rhinorrhea = Yes |       |      |            |         |
|------|------------|------------|-----------------------|------------|--------------|-----------|------------------|-------|------|------------|---------|
|      |            |            | No (n = 51)           |            | Yes (n = 22) |           | Coeff            | SE    | OR   | 95% CI     | p value |
|      |            |            | N                     | N (%)      | N            | N (%)     |                  |       |      |            |         |
| TW   |            |            | 50                    |            | 21           |           | 1.59             | 0.80  | 4.89 | 1.02–23.53 | 0.047   |
|      | Negative   | 19         |                       | 17 (34.0)  |              | 2 (9.5)   |                  |       |      |            |         |
|      | Positive   | 52         |                       | 33 (66.0)  |              | 19 (90.5) |                  |       |      |            |         |
| NP   |            |            | 49                    |            | 19           |           | −0.94            | 0.68  | 0.39 | 0.10–1.48  | 0.17    |
|      | Negative   | 11         |                       | 6 (12.2)   |              | 5 (26.3)  |                  |       |      |            |         |
|      | Positive   | 57         |                       | 43 (87.8)  |              | 14 (73.7) |                  |       |      |            |         |
| Pool |            |            | 35                    |            | 10           |           | −0.94            | 0.84  | 0.39 | 0.07–2.03  | 0.26    |
|      | Negative   | 8          |                       | 5 (14.3)   |              | 3 (30.0)  |                  |       |      |            |         |
|      | Positive   | 37         |                       | 30 (85.7)  |              | 7 (70.0)  |                  |       |      |            |         |
| S    |            |            | 46                    |            | 20           |           | 0.12             | 0.58  | 1.13 | 0.36–3.52  | 0.83    |
|      | Negative   | 21         |                       | 15 (32.6)  |              | 6 (30.0)  |                  |       |      |            |         |
|      | Positive   | 45         |                       | 31 (67.4)  |              | 14 (70.0) |                  |       |      |            |         |
| OP   |            |            | 48                    |            | 18           |           | −0.11            | 0.56  | 0.89 | 0.30–2.66  | 0.84    |
|      | Negative   | 28         |                       | 20 (41.7)  |              | 8 (44.4)  |                  |       |      |            |         |
|      | Positive   | 38         |                       | 28 (58.3)  |              | 10 (55.6) |                  |       |      |            |         |
| R    |            |            | 22                    |            | 6            |           | 12.18            | 210.7 | 12.3 | /          | 0.21*   |
|      | Negative   | 27         |                       | 22 (100.0) |              | 5 (83.3)  |                  |       |      |            |         |
|      | Positive   | 1          |                       | 0 (0.0)    |              | 1 (16.7)  |                  |       |      |            |         |

Table S4. Effect of fever on the probability of detecting SARS-CoV-2 at T1

| Swab | Categories | Total<br>N | Covariate: Fever |           |              |           | Fever = Yes |      |      |            |         |
|------|------------|------------|------------------|-----------|--------------|-----------|-------------|------|------|------------|---------|
|      |            |            | No (n = 57)      |           | Yes (n = 16) |           | Coeff       | SE   | OR   | 95% CI     | p value |
|      |            |            | N                | N (%)     | N            | N (%)     |             |      |      |            |         |
| TW   |            |            | 55               |           | 16           |           | 1.99        | 1.07 | 7.30 | 0.89–59.66 | 0.064   |
|      | Negative   | 19         |                  | 18 (32.7) |              | 1 (6.2)   |             |      |      |            |         |
|      | Positive   | 52         |                  | 37 (67.3) |              | 15 (93.8) |             |      |      |            |         |
| NP   |            |            | 53               |           | 15           |           | 1.18        | 1.09 | 3.25 | 0.38–27.71 | 0.28    |
|      | Negative   | 11         |                  | 10 (18.9) |              | 1 (6.7)   |             |      |      |            |         |
|      | Positive   | 57         |                  | 43 (81.1) |              | 14 (93.3) |             |      |      |            |         |

| Swab | Categories | Total<br>N | Covariate: Fever |            |              |           | Fever = Yes |       |       |           |         |
|------|------------|------------|------------------|------------|--------------|-----------|-------------|-------|-------|-----------|---------|
|      |            |            | No (n = 57)      |            | Yes (n = 16) |           | Coeff       | SE    | OR    | 95% CI    | p value |
|      |            |            | N                | N (%)      | N            | N (%)     |             |       |       |           |         |
| S    | Negative   | 21         | 51               | 20 (39.2)  | 15           | 1 (6.7)   | 2.20        | 1.07  | 9.03  | 1.1–74.13 | 0.041   |
|      | Positive   | 45         |                  | 31 (60.8)  |              | 14 (93.3) |             |       |       |           |         |
| Pool | Negative   | 8          | 34               | 6 (17.7)   | 11           | 2 (18.2)  | −0.037      | 0.90  | 0.96  | 0.16–5.65 | 0.97    |
|      | Positive   | 37         |                  | 28 (82.4)  |              | 9 (81.8)  |             |       |       |           |         |
| OP   | Negative   | 28         | 52               | 23 (44.2)  | 14           | 5 (35.7)  | 0.6         | 0.62  | 1.43  | 0.42–4.85 | 0.57    |
|      | Positive   | 38         |                  | 29 (55.8)  |              | 9 (64.3)  |             |       |       |           |         |
| R    | Negative   | 27         | 21               | 21 (100.0) | 7            | 6 (85.7)  | 12.34       | 255.1 | 9.92* | /         | 0.25*   |
|      | Positive   | 1          |                  | 0 (0.0)    |              | 1 (14.3)  |             |       |       |           |         |

Table S5. Effect of sore throat on the probability of detecting SARS-CoV-2 at T1

| Swab       | Categories | Total<br>N | Covariate: Sore throat |           |              |           | Sore throat = Yes |      |       |            |         |
|------------|------------|------------|------------------------|-----------|--------------|-----------|-------------------|------|-------|------------|---------|
|            |            |            | No (n = 58)            |           | Yes (n = 15) |           | Coeff             | SE   | OR    | 95% CI     | p value |
|            |            |            | N                      | N (%)     | N            | N (%)     |                   |      |       |            |         |
| TW         | Negative   | 19         | 56                     | 18 (32.1) | 15           | 1 (6.7)   | 1.89              | 1.07 | 6.63  | 0.81–54.41 | 0.078   |
|            | Positive   | 52         |                        | 38 (67.9) |              | 14 (93.3) |                   |      |       |            |         |
| NP         | Negative   | 11         | 57                     | 9 (15.8)  | 11           | 2 (18.2)  | −0.17             | 0.86 | 0.84  | 0.16–4.57  | 0.84    |
|            | Positive   | 57         |                        | 48 (84.2) |              | 9 (81.8)  |                   |      |       |            |         |
| Salivary   | Negative   | 21         | 52                     | 18 (34.6) | 14           | 3 (21.4)  | 0.66              | 0.71 | 1.94  | 0.48–7.86  | 0.35    |
|            | Positive   | 45         |                        | 34 (65.4) |              | 11 (78.6) |                   |      |       |            |         |
| Oropharynx | Negative   | 28         | 54                     | 25 (46.3) | 12           | 3 (25.0)  | 0.95              | 0.72 | 2.59  | 0.63–10.61 | 0.19    |
|            | Positive   | 38         |                        | 29 (53.7) |              | 9 (75.0)  |                   |      |       |            |         |
| Pool       | Negative   | 8          | 40                     | 5 (12.5)  | 5            | 3 (60.0)  | −2.35             | 1.03 | 0.095 | 0.01–0.72  | 0.023   |
|            | Positive   | 37         |                        | 35 (87.5) |              | 2 (40.0)  |                   |      |       |            |         |
